# Supplementary material for: Galactolipids Are Essential for Internal Membrane Transformation during Etioplast-to-Chloroplast Differentiation
Source: PubMed Central journal article supplement — Plant Cell Physiol. 2019 Mar 20;60(6):1224–38. doi: 10.1093/pcp/pcz041 (PMC6553665; doi:10.1093/pcp/pcz041), 2019-03-20
Supplement: pcz041_supplementary_data.pdf [file pcz041_supplementary_data.pdf]

**Table S1.** Oligonucleotide primers used for quantitative reverse transcription-PCR analysis.

| <b>Gene</b>    | <b>Accession number</b> | <b>Forward primer (5' → 3')</b> | <b>Reverse primer (5' → 3')</b>   |
|----------------|-------------------------|---------------------------------|-----------------------------------|
| <i>ACT8</i>    | AT1G49240               | ACTGTGCCTATCTACGAGGGTTTC        | CCCGTTCGCTGTTGTGGT                |
| <i>MGD1</i>    | AT4G31780               | GCAGGACTTGAAACATCACAAATC        | GCGAACTGGTTTCACAAAGGA             |
| <i>MGD2</i>    | AT5G20410               | AACATGTCTCCCTTAGTAGTTCTTTTGTC   | GTTGATATTGTTAATGGCTAACAATAATGC    |
| <i>MGD3</i>    | AT2G11810               | GGATATCCATCATCTATCCCAACAA       | GATAAAAGAATGACAAACCACTAGAGAATATAC |
| <i>DGD1</i>    | AT3G11670               | CTGAAGAGAGATCCCGTGGTG           | TCCCAAGTTCGCTTTTGTGTT             |
| <i>DGD2</i>    | AT4G00550               | TGCAGAACCTATGACGATGGA           | GCTCTGTAAGTTGCGATGGTTG            |
| <i>HEMA1</i>   | AT1G58290               | TAAGATTAGCTTCCCCACAAACTC        | AGCTCGCTTATAGCTTCACAACAC          |
| <i>CHLH</i>    | AT5G13630               | TGGTAGAGAGACAGAAGCTCGAAA        | CCAAAGAACCTGCCCAAGAG              |
| <i>LHCB1.2</i> | AT1G29910               | GTGTGACAATGAGGAAGACTGTTGCC      | AAATGCTCTGAGCGTGGACCAAGCTA        |
| <i>LHCB6</i>   | AT1G15820               | GGACTTTGAGAAGCTGGAGAGG          | ACAAACCAAGAGCACCGAGAG             |

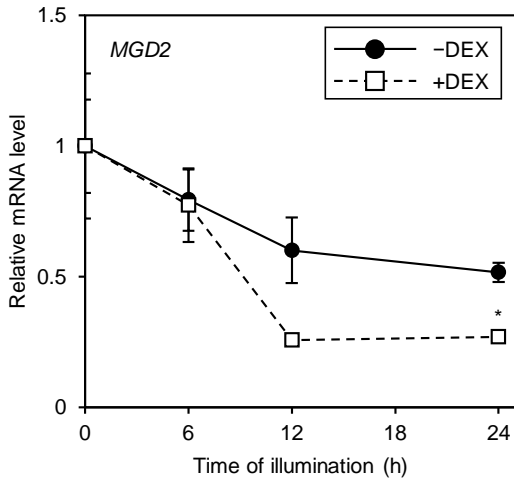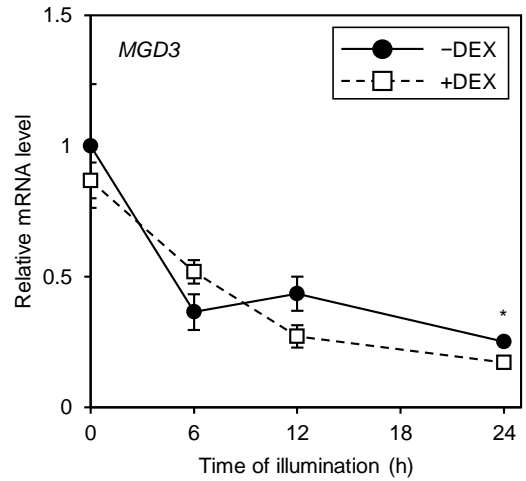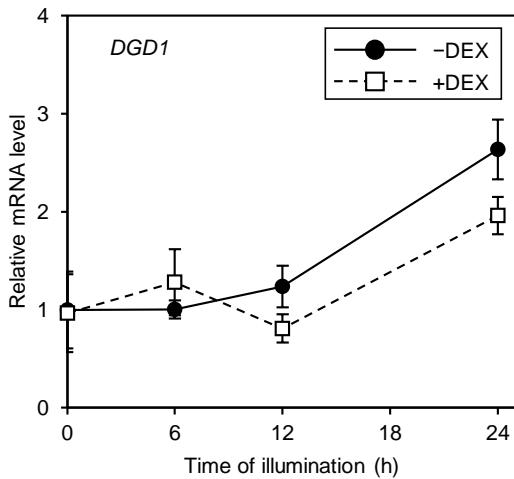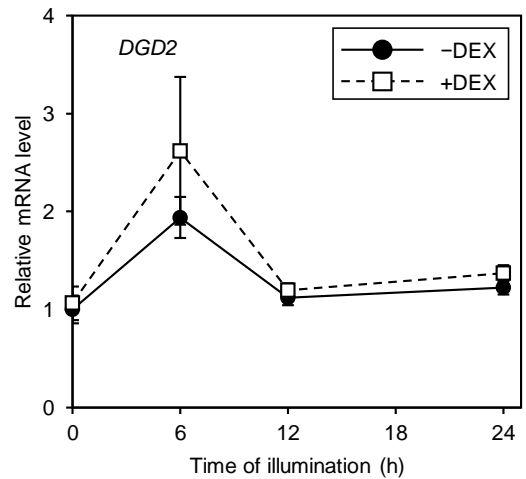

**Fig. S1.** mRNA levels of *MGD2*, *MGD3*, *DGD1* and *DGD2* during greening of dark-grown *amiR-MGD1* seedlings. Seedlings were illuminated for 6, 12 and 24 h after 4-d growth in the dark (0 h) in the absence (-) or presence (+) of DEX. Fold difference from the -DEX control at 0 h after normalization to the control gene *ACTIN8* is shown for each gene. Data are mean  $\pm$  SE from three independent experiments. Asterisks indicate significant difference from the -DEX control ( $P < 0.05$ , Student's *t*-test).

A

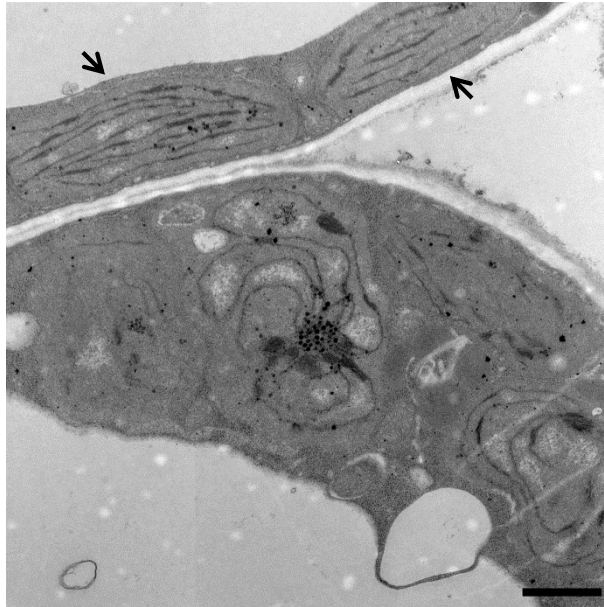

B

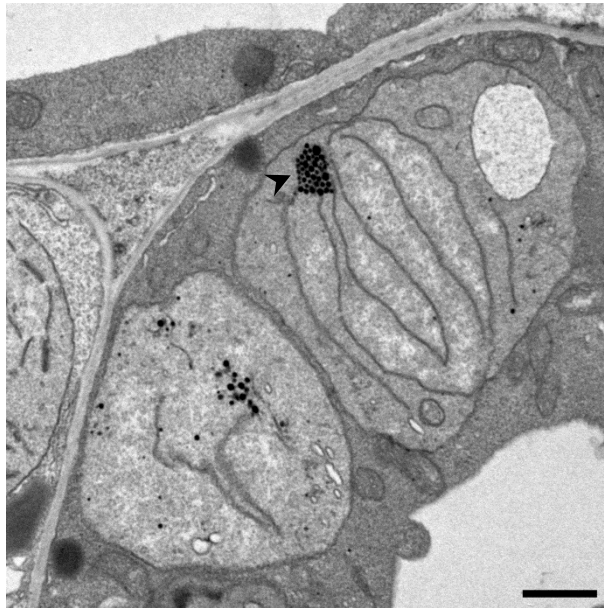

**Fig. S2.** Ultrastructure of cotyledon plastids in DEX-treated *amiR-MGD1* seedlings illuminated for (A) 6 h and (B) 20 h after 4-d growth in the dark. Arrows in (A) indicate plastids with thylakoid-like membrane structures. An arrowhead in (B) indicates a cluster of high electron-dense particles similar to plastoglobuli. Bars = 1.0  $\mu\text{m}$ .

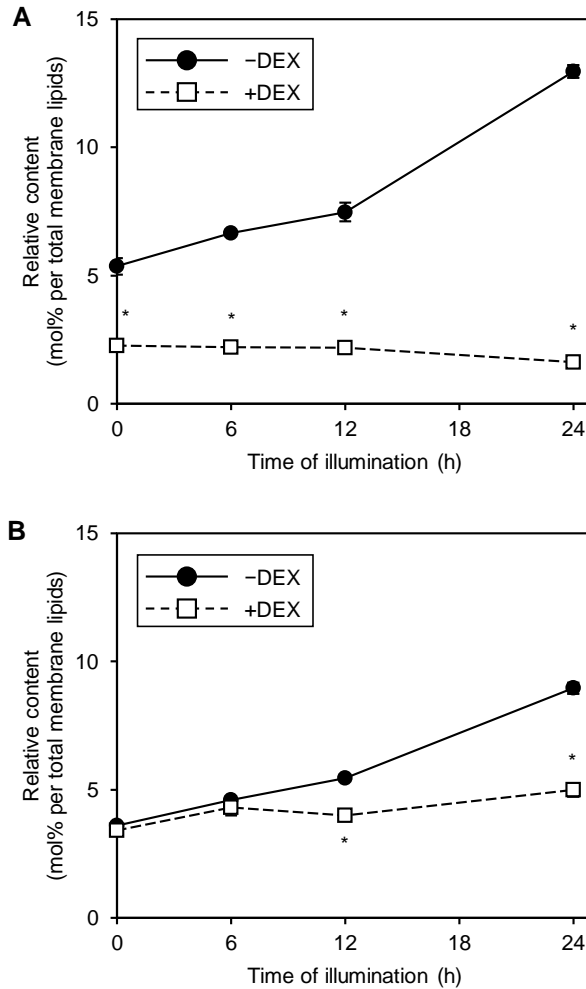

**Fig. S3.** Changes in relative galactolipid content during greening of dark-grown *amiR-MGD1* seedlings. Proportions (mol%) of (A) MGDG and (B) DGDG in total membrane lipids. Seedlings were illuminated for indicated hours after 4-d growth in the dark in the absence (-) or presence (+) of DEX. Data are means  $\pm$  SE from three independent experiments. Asterisks indicate significant difference from the -DEX control ( $P < 0.05$ , Student's *t*-test).

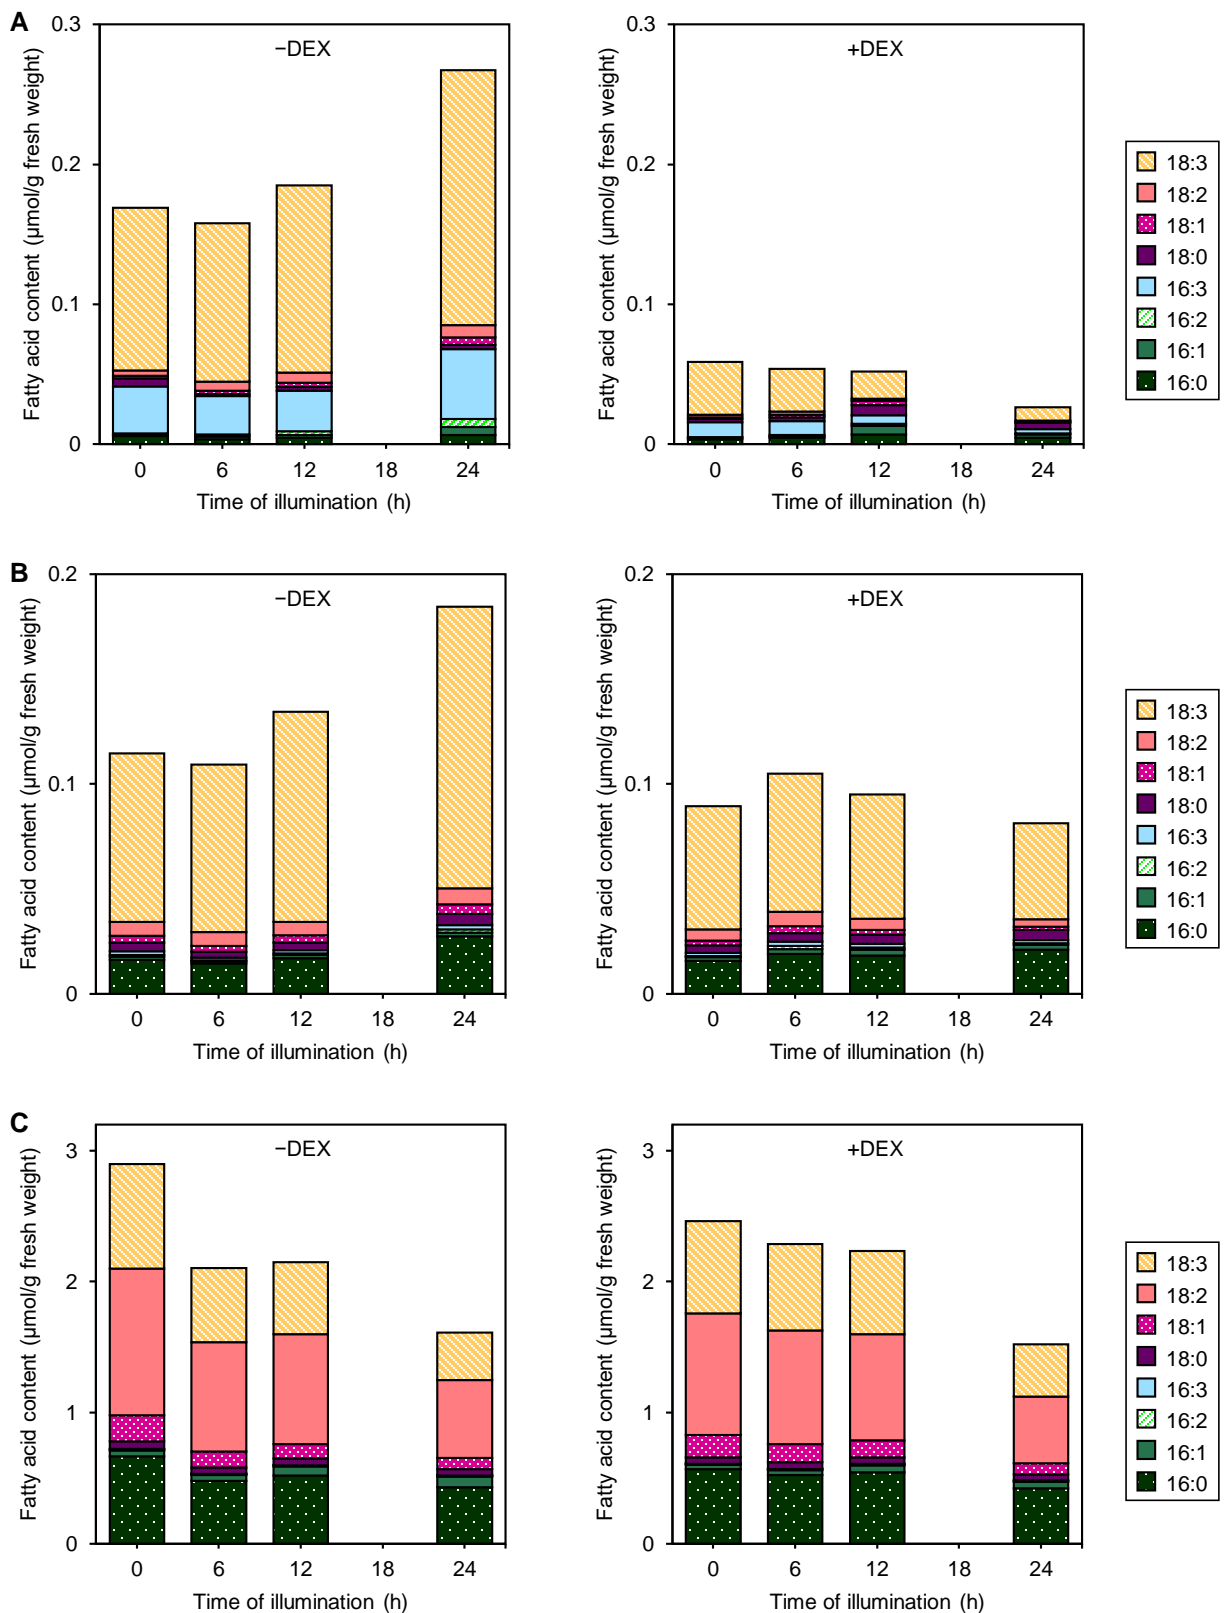

**Fig. S4.** Changes in absolute amount of fatty acids of galactolipids during greening of dark-grown *amiR-MGD1* seedlings. Fatty acid content of (A) MGDG, (B) DGDG and (C) other membrane lipids shown on a fresh weight basis. Seedlings were illuminated for indicated hours after 4-d growth in the dark in the absence (-) or presence (+) of DEX. Data are means from three independent experiments.

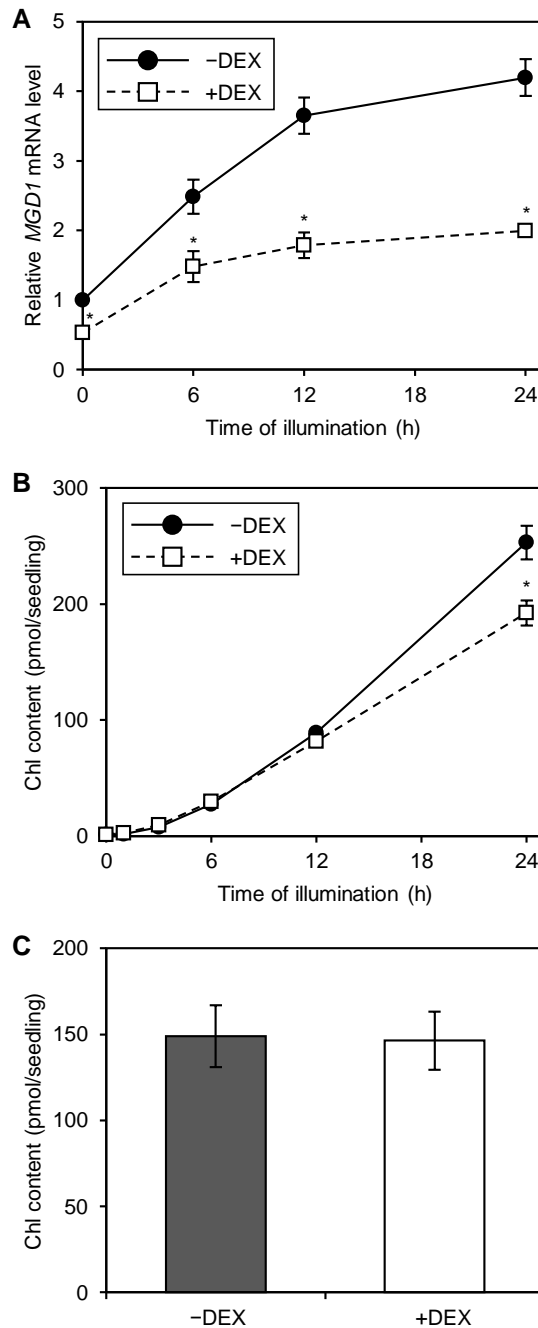

**Fig. S5.** Effects of DEX treatment to a weak *amiR-MGD1* line (L4g) and wild type (*Landsberg erecta*) during greening. Changes in (A) *MGD1* mRNA levels and (B) Chl content in L4g seedlings after illumination in the absence (-) or presence (+) of DEX. In (A), *MGD1* mRNA levels were presented as fold difference from the -DEX control at 0 h of illumination after normalization to the control gene *ACTIN8*. In (B), amount of protochlorophyllide (Fujii et al., 2017) is shown for 0 h instead of Chl amount. (C) Chl content in wild-type seedlings illuminated for 24 h. In (A) and (C), data are means  $\pm$  SE from three independent experiments. In (B), data are means  $\pm$  SE from 15 (0 h) or three (1, 3, 6, 12, 24 h) independent experiments. Asterisks indicate significant difference from the -DEX control ( $P < 0.05$ , Student's *t*-test). In all experiments, plants were grown for 4 d in the dark and then illuminated for indicated hours.

**A**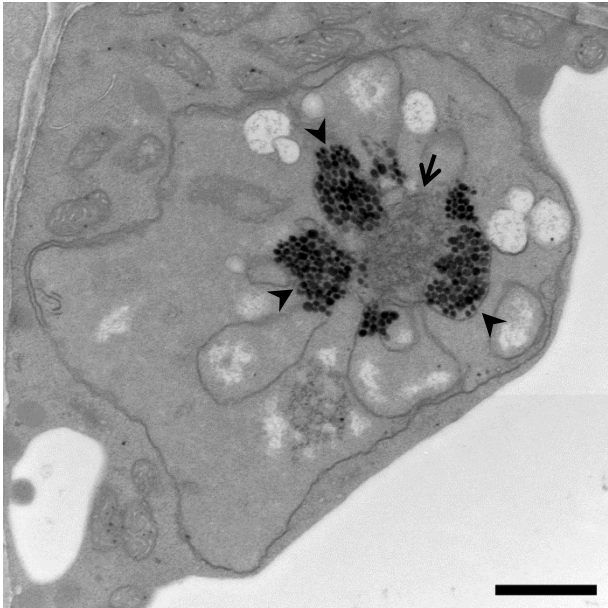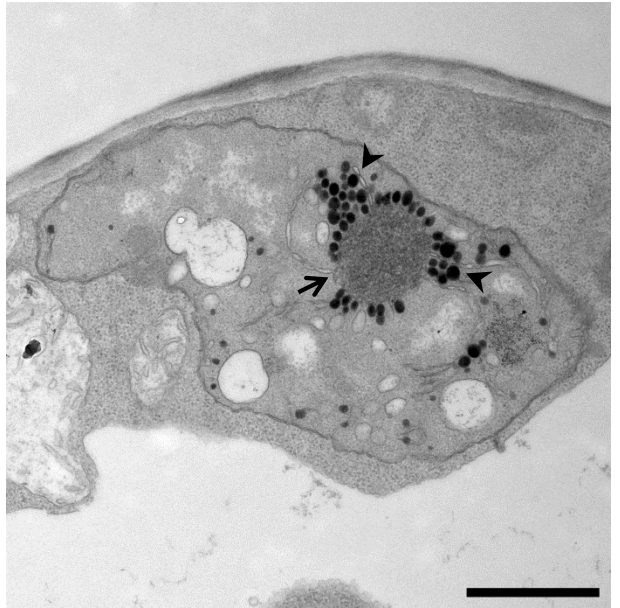**B**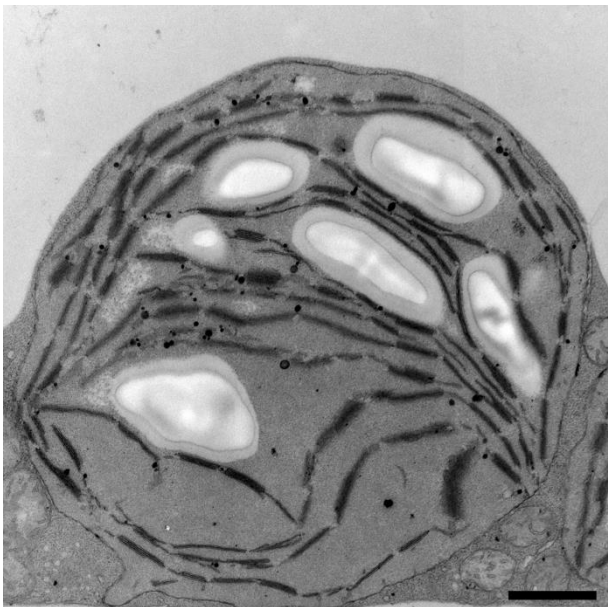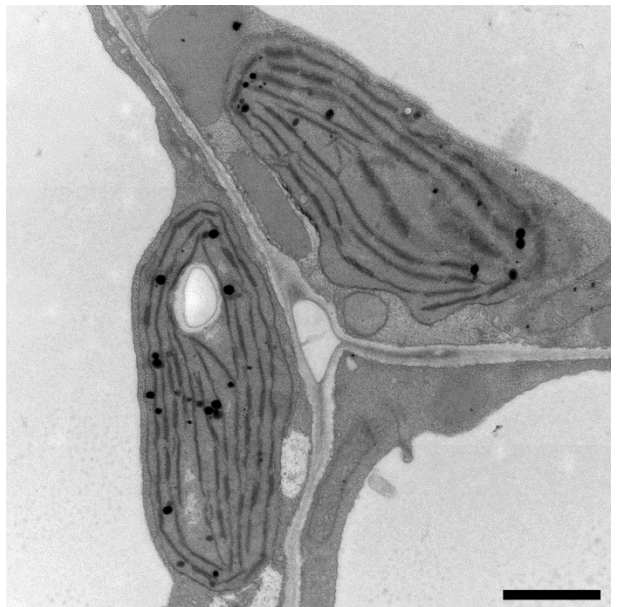

**Fig. S6.** Ultrastructure of cotyledon plastids in *dgd1* seedlings illuminated for (A) 24 h and (B) 72 h after 4-d growth in the dark. Arrows and arrowheads in (A) indicate circular aggregates of membrane tubules and clusters of plastoglobule-like high electron-dense particles, respectively. In (B), a plastid with thylakoid-free areas (left) and that with underdeveloped thylakoid membranes (right) are shown. Bars = 1.0  $\mu\text{m}$ .

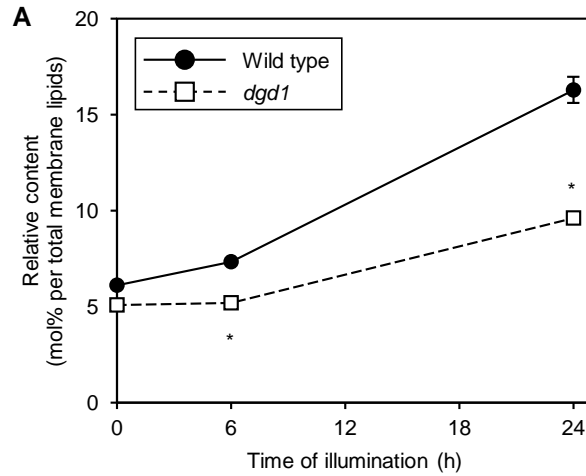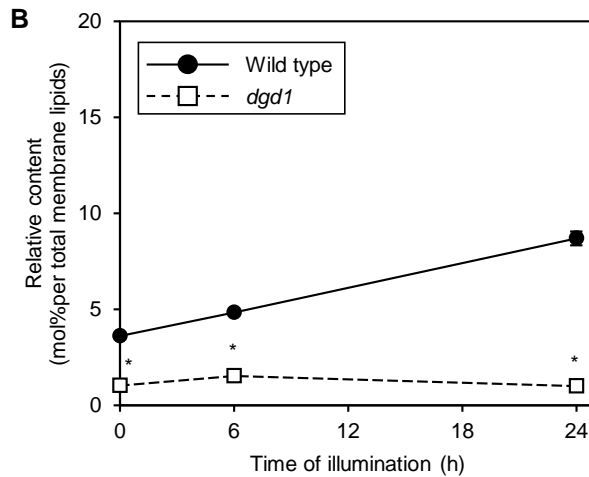

**Fig. S7.** Changes in relative galactolipid content during greening of dark-grown seedlings of wild type and the *dgd1* mutant. Proportions (mol%) of (A) MGDG and (B) DGDG in total membrane lipids. Plants were grown for 4 d in the dark and then illuminated for indicated hours. Data are means  $\pm$  SE from three independent experiments. Asterisks indicate significant difference from the wild type ( $P < 0.05$ , Student's *t*-test).



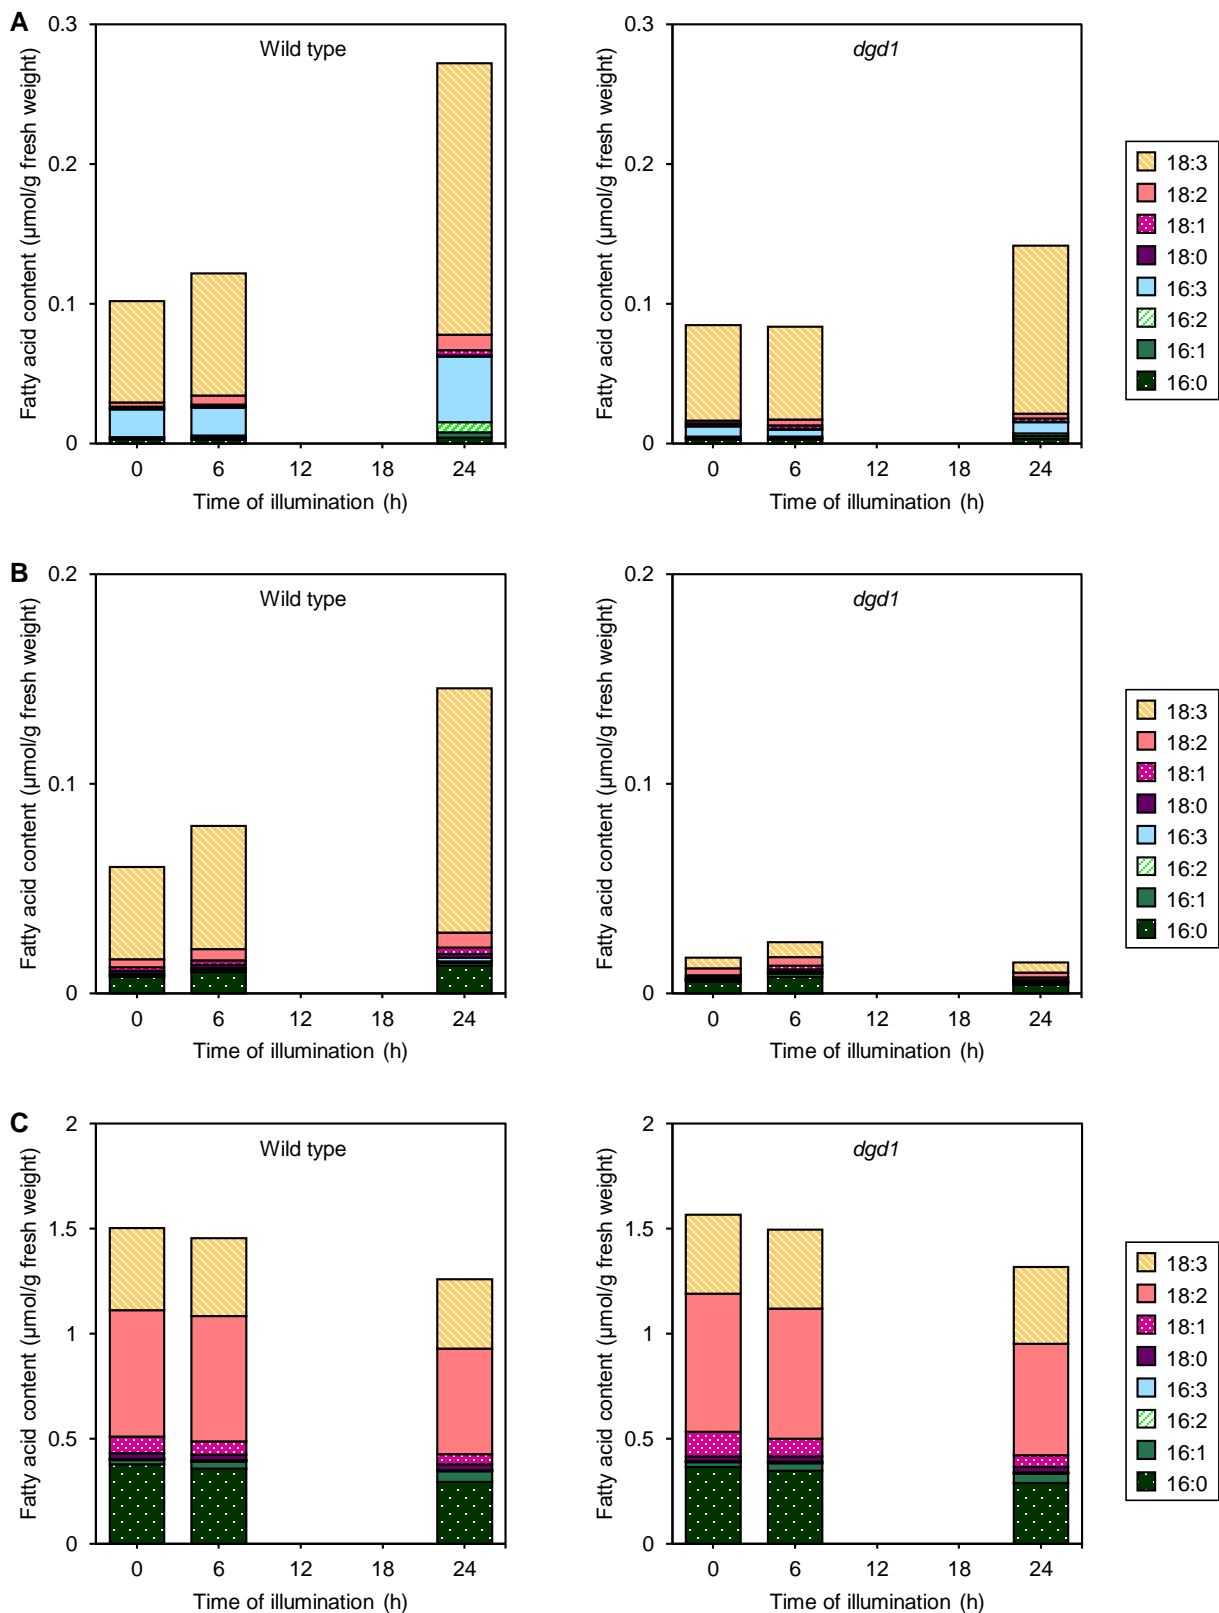

**Fig. S8.** Changes in absolute amount of fatty acids of galactolipids during greening of dark-grown seedlings of wild type and the *dgd1* mutant. Fatty acid content of (A) MGDG, (B) DGDG and (C) other membrane lipids was shown on a fresh weight basis. Seedlings were illuminated for indicated hours after 4-d growth in the dark. Data are means from three independent experiments.
